# Supplementary material
Source: publisher site journal article supplement (https://mbmg.pensoft.net/article/68575/download/suppl/37/)
Supplement: Supplementary file 1

*Supplement 7: Rarefaction curves for each metabarcoding assay (fish (16S); crustacean (16S)) per habitat for each sampling site. Number of taxa are indicated on the y-axis and number of reads on the x-axis. Sampling site notation follows the abbreviations of Supplement 1.*

*
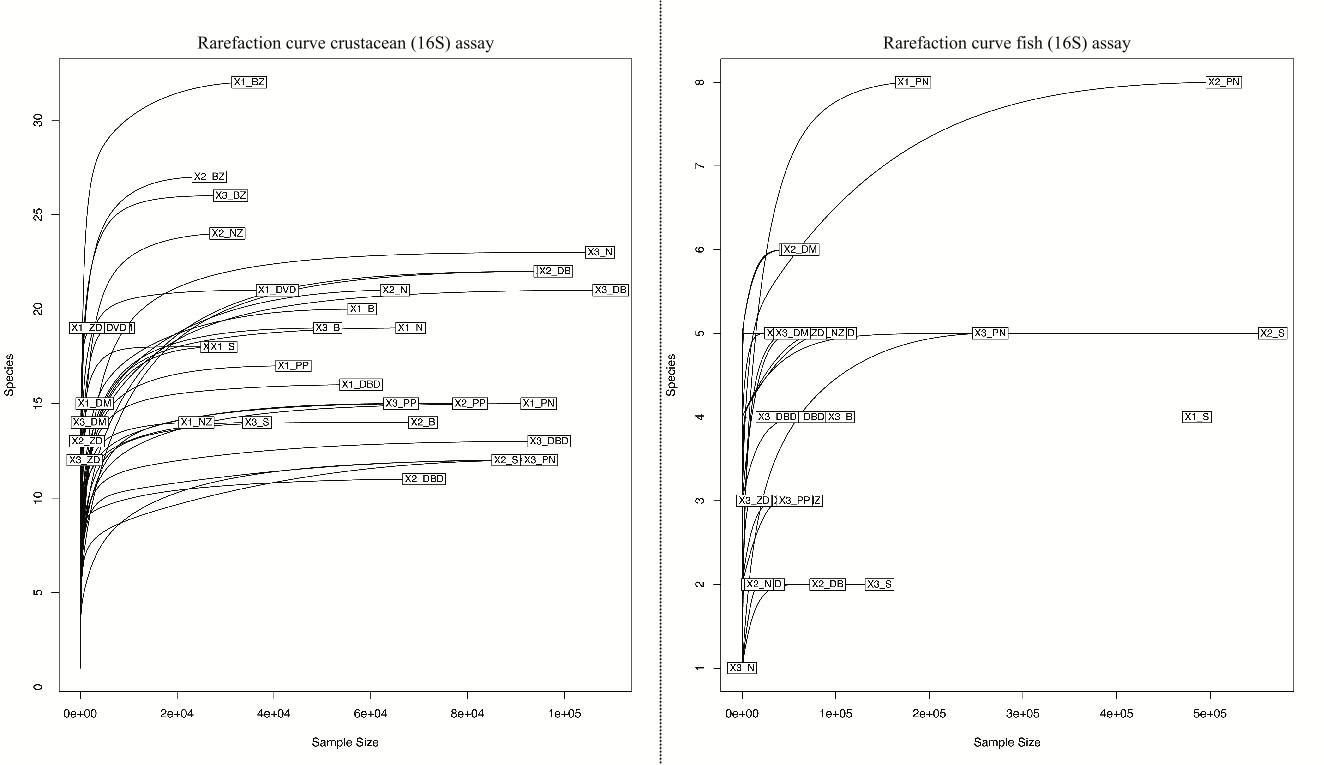
*
